# Supplementary material
Source: PubMed Central journal article supplement (PMC3816014)
Supplement: NIHMS458693-supplement-1.pdf [file NIHMS458693-supplement-1.pdf]

## Supplementary Material

### *Measures and Procedures*

The CEVQ has shown good test-retest reliability, with kappas of 0.85, 0.77, 0.92 and 0.87 for physical abuse, severe physical abuse, sexual abuse and severe sexual abuse, respectively, and good criterion validity when measured against clinical assessment, with kappas of 0.67 and 0.70 for physical and sexual abuse, respectively (18). The CTQ has test-retest reliability values of 0.80 to 0.83 and internal consistency values of 0.79 to 0.94 (21). The Tanner self-assessment questionnaire measures pubertal status. For reports of breast and pubic hair development, reliability is as follows: inter-rater agreement for breast (kappa = 0.43) and pubic hair (kappa = 0.60) (24) and three-month test-retest reliabilities for pubic hair (kappa = 1.0) (22).

The K-SADS-E is a semi-structured diagnostic interview measuring past and current psychopathology in children and adolescents. It assesses signs and symptoms of Axis I disorders, including MDD and PTSD, according to the DSM-IV criteria, and has been shown to have good primary diagnostic reliability (kappa = 0.86) (29).
